# Supplementary material
Source: ML conference proceedings conference paper supplement (https://openreview.net/forum?id=CRPNhlp4jM)

Household,  $n = 2876$ ,  $m = 50$  (Ave. Relative Errors)

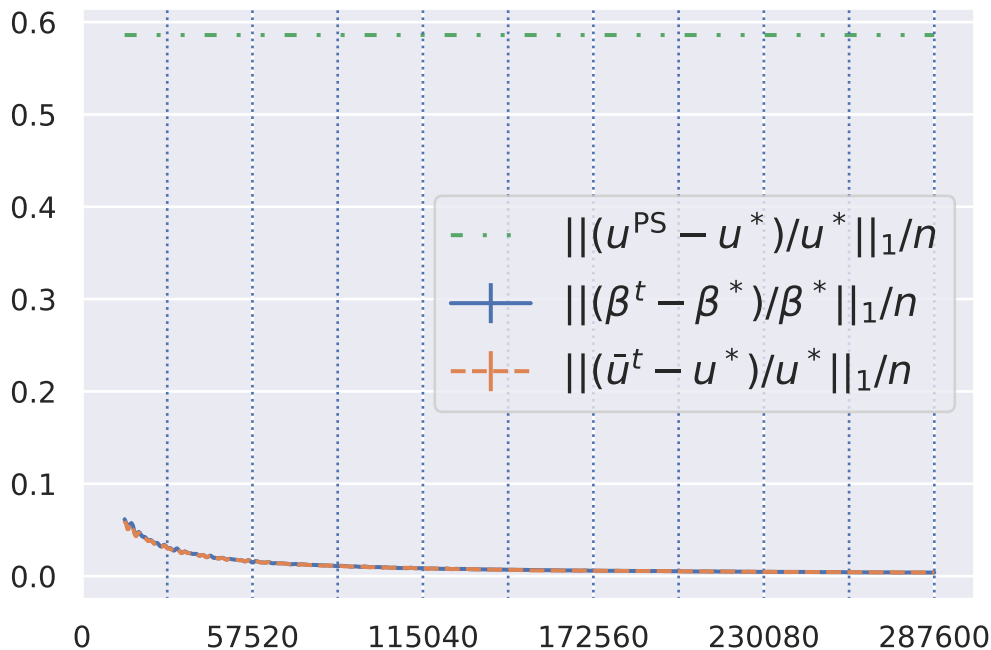

Supplement: supplementary_material [file attachment]

Household,  $n = 2876$ ,  $m = 50$  (Max Relative Errors)

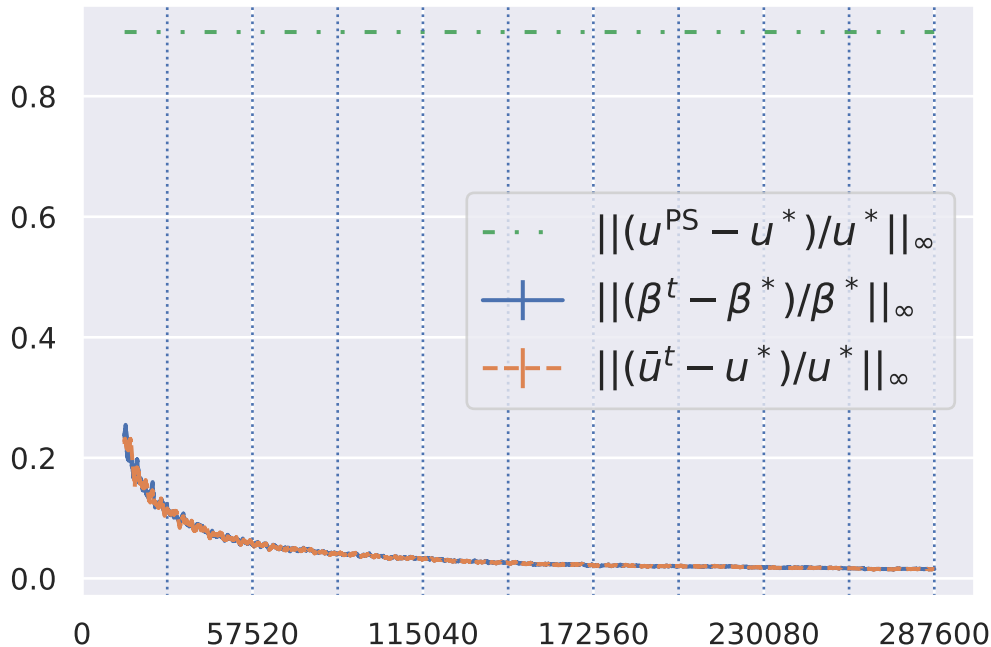

Supplement: supplementary_material [file attachment]

Inf-Dim  $n = 100$ ,  $\Theta = [0, 1]$  (Max Relative Errors)

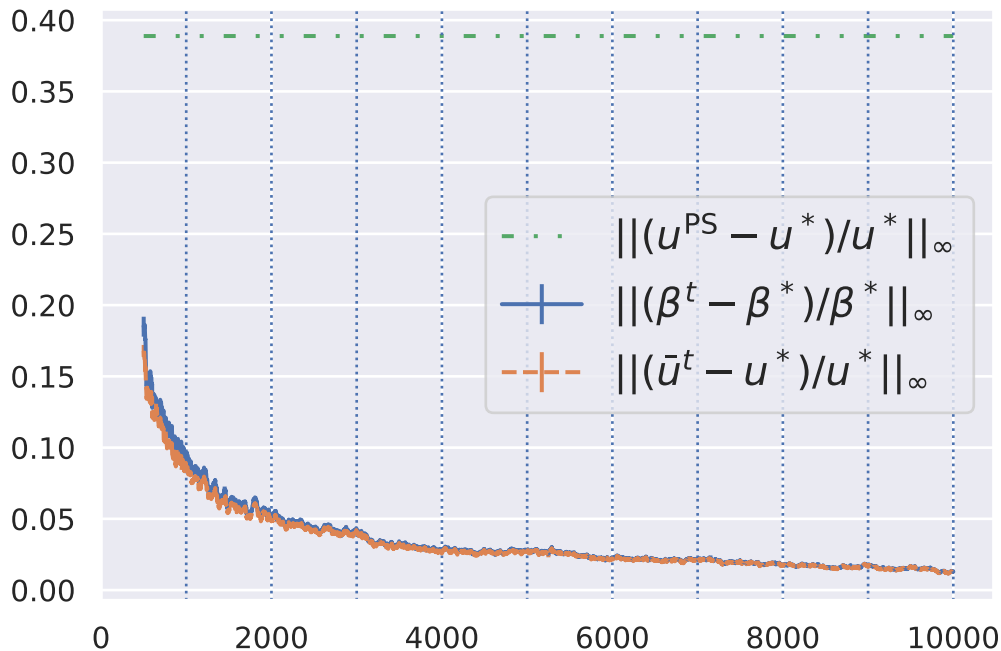

Supplement: supplementary_material [file attachment]

MovieLens, Quartiles of  $||(\bar{b}^t - B)/B||_1/n$

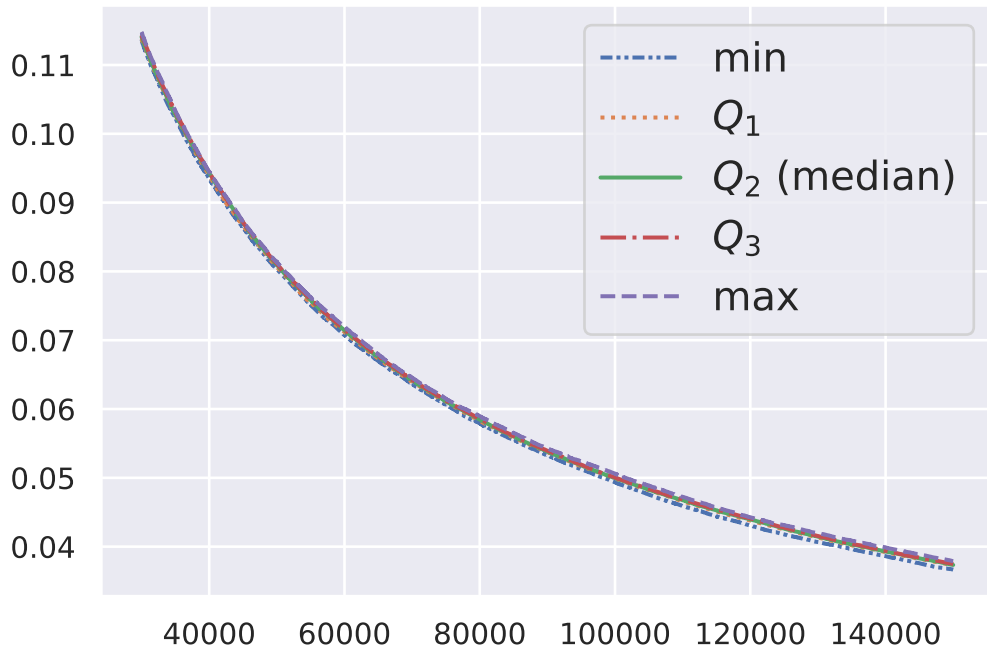

Supplement: supplementary_material [file attachment]

Jokes, Quartiles of  $||(\bar{b}^t - B)/B||_\infty$

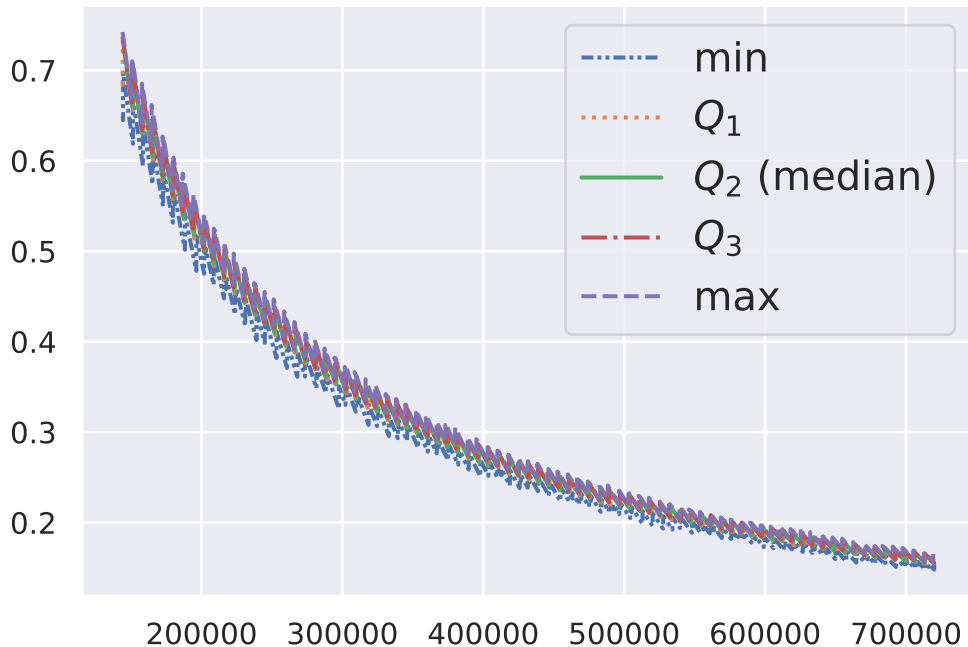

Supplement: supplementary_material [file attachment]

Inf-Dim, Quartiles of  $\|(\bar{b}^t - B)/B\|_\infty$

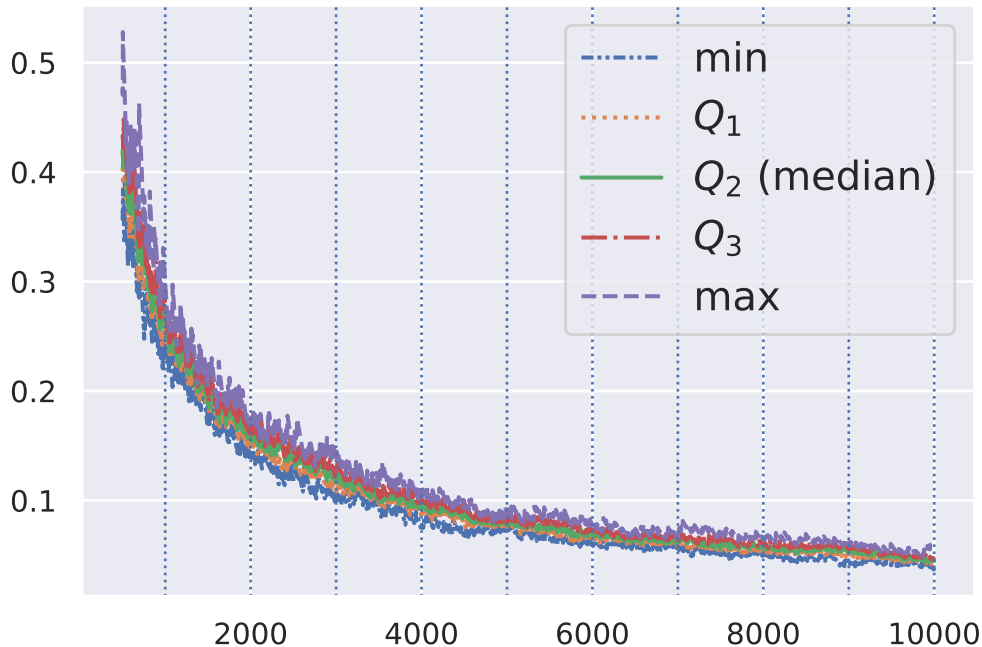

Supplement: supplementary_material [file attachment]

# Jokes, $n = 7200$ , $m = 100$ (Ave. Relative Errors)

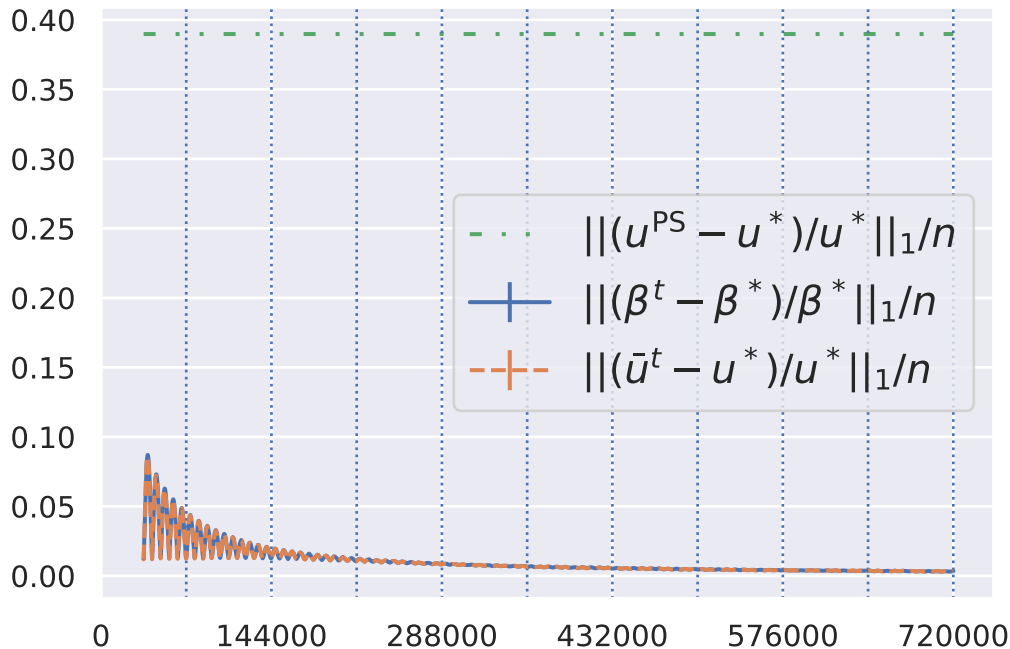

Supplement: supplementary_material [file attachment]

# MovieLens, $n = 1500$ , $m = 1500$ (Max Relative Errors)

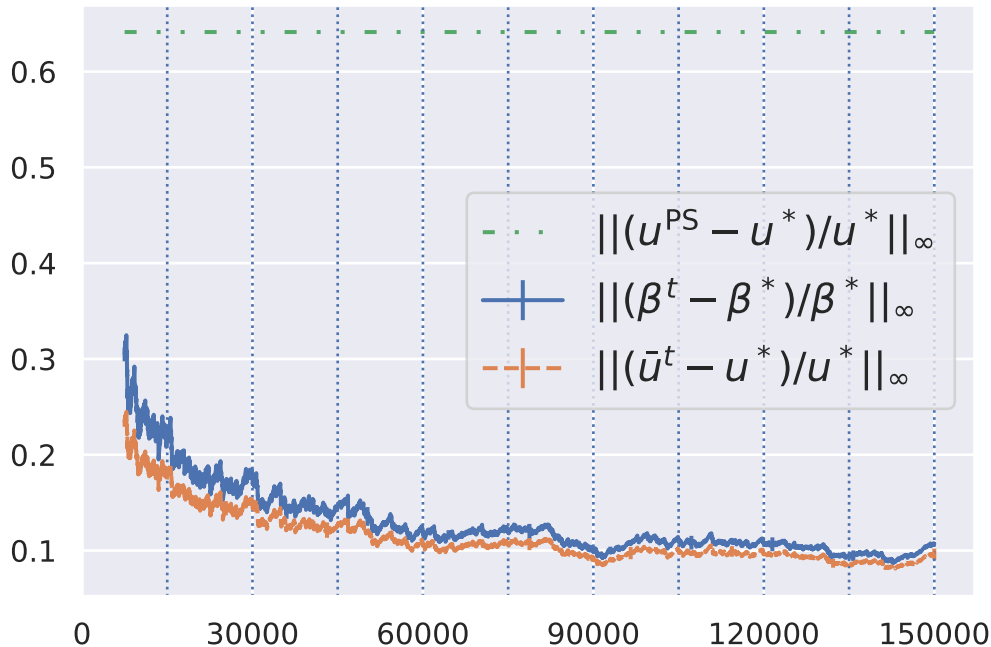

Supplement: supplementary_material [file attachment]

Inf-Dim  $n = 100$ ,  $\Theta = [0, 1]$  (Average Relative Errors)

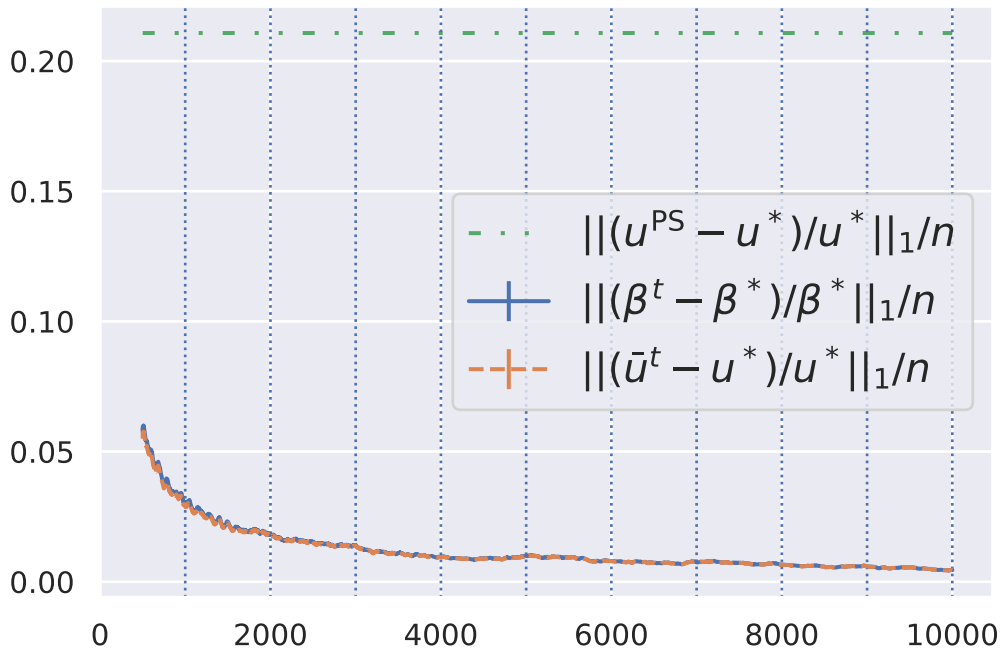

Supplement: supplementary_material [file attachment]

Household, Quartiles of  $||(\bar{b}^t - B)/B||_\infty$

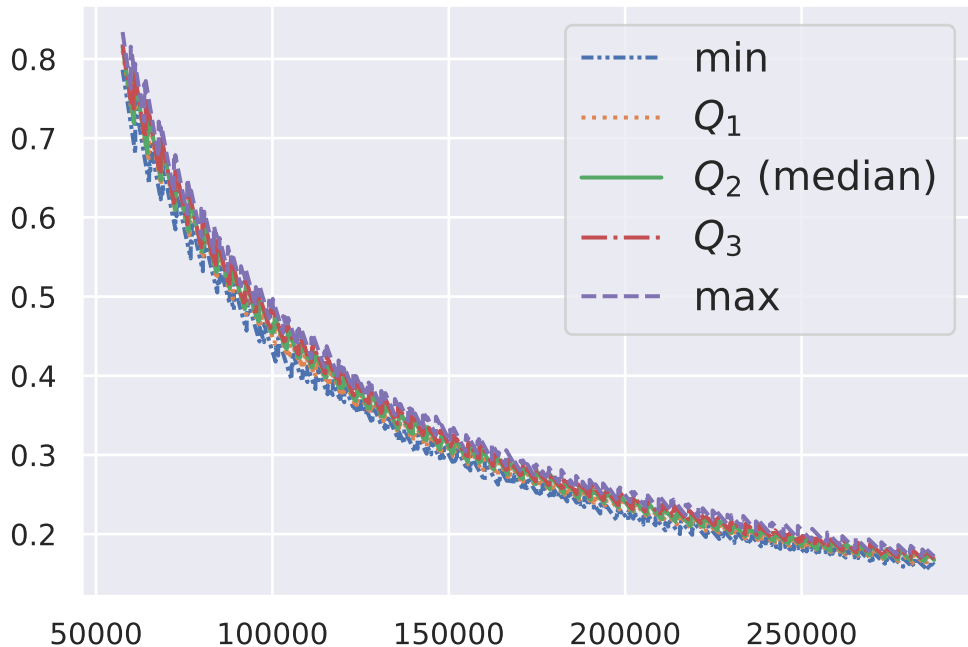

Supplement: supplementary_material [file attachment]

Household, Quartiles of  $||(\bar{b}^t - B)/B||_1/n$

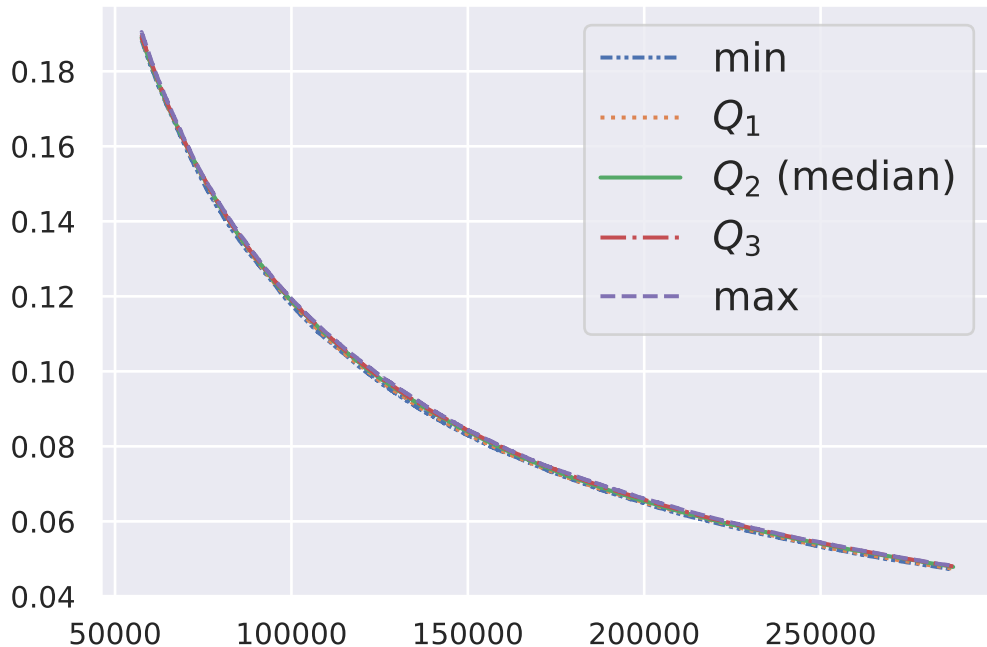

Supplement: supplementary_material [file attachment]

MovieLens, Quartiles of  $||(\bar{b}^t - B)/B||_\infty$

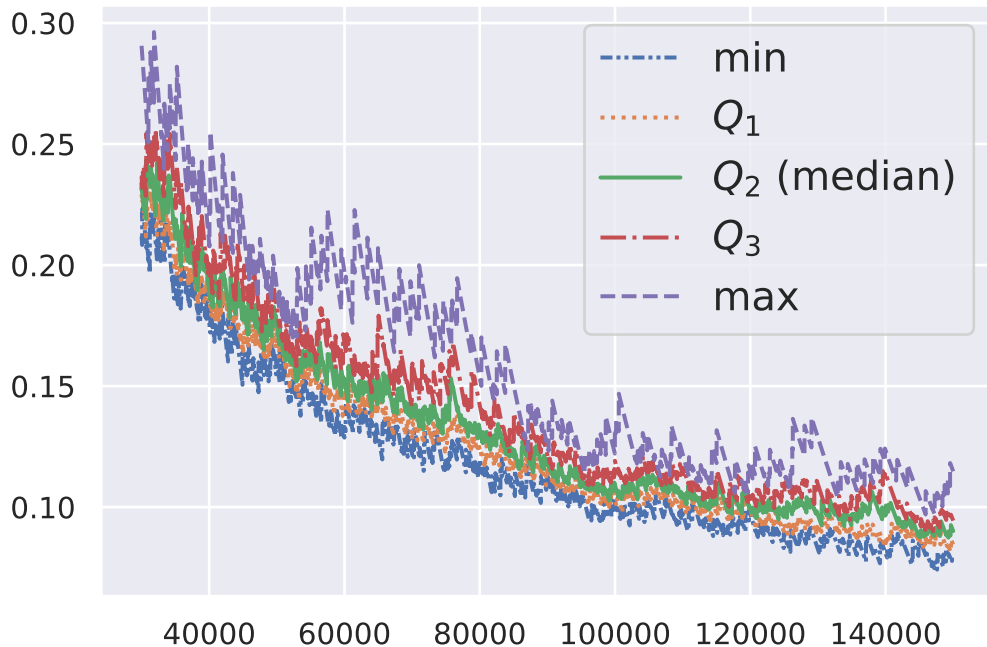

Supplement: supplementary_material [file attachment]

Inf-Dim, Quartiles of  $||(\bar{b}^t - B)/B||_1/n$

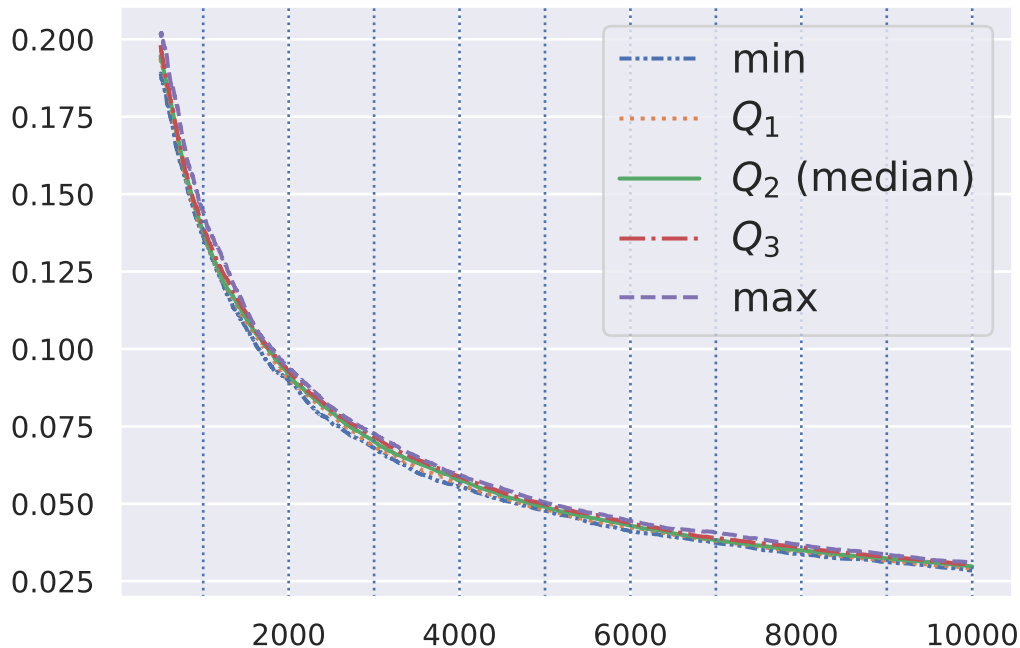

Supplement: supplementary_material [file attachment]

Jokes, Quartiles of  $||(\bar{b}^t - B)/B||_1/n$

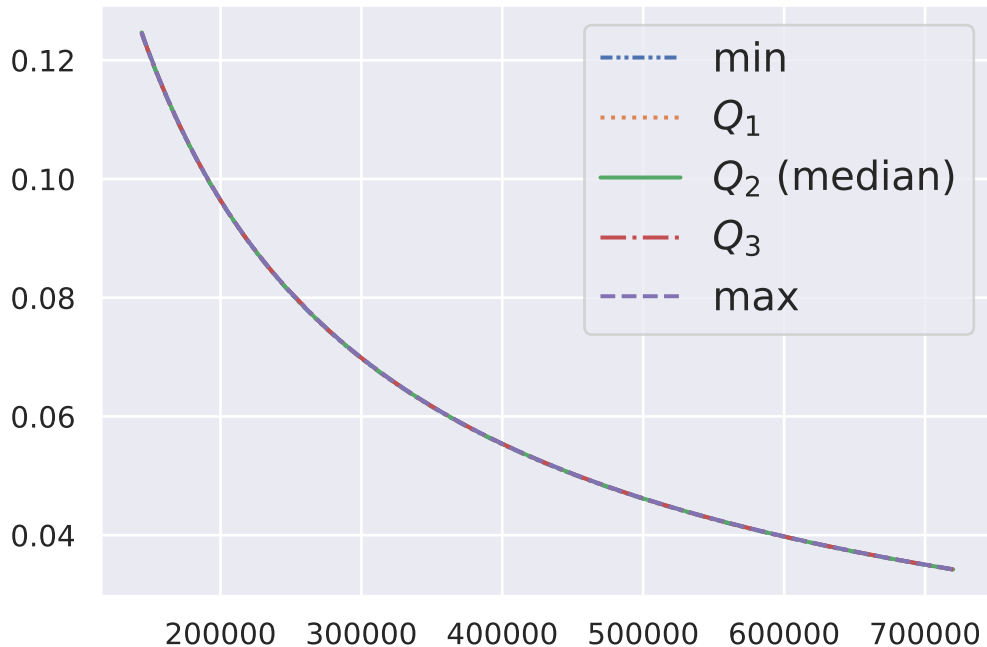

Supplement: supplementary_material [file attachment]

Jokes,  $n = 7200$ ,  $m = 100$  (Max Relative Errors)

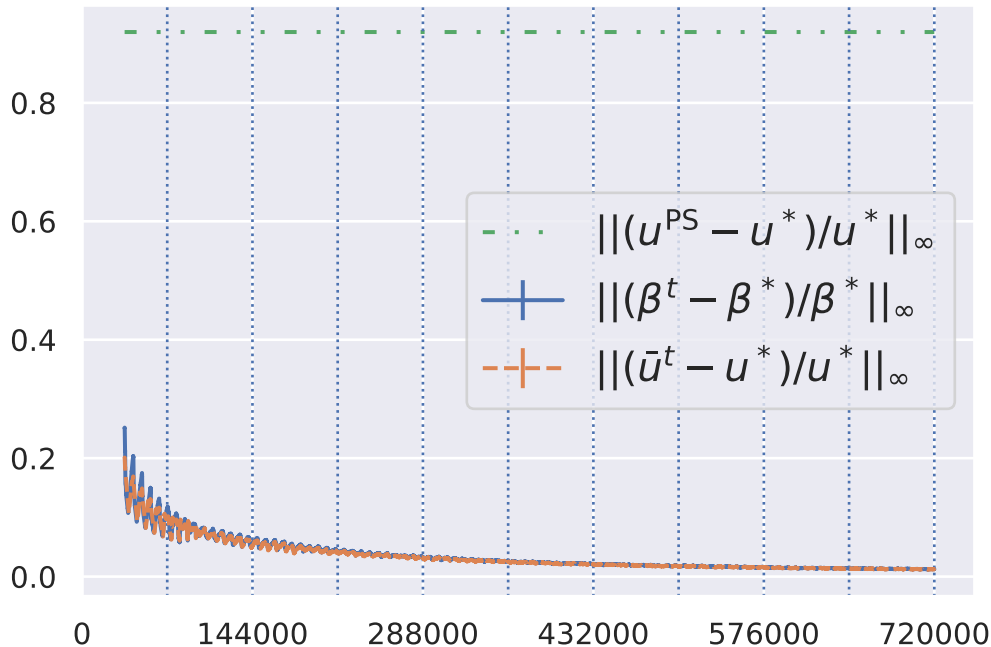

Supplement: supplementary_material [file attachment]

MovieLens,  $n = 1500$ ,  $m = 1500$  (Ave. Relative Errors)

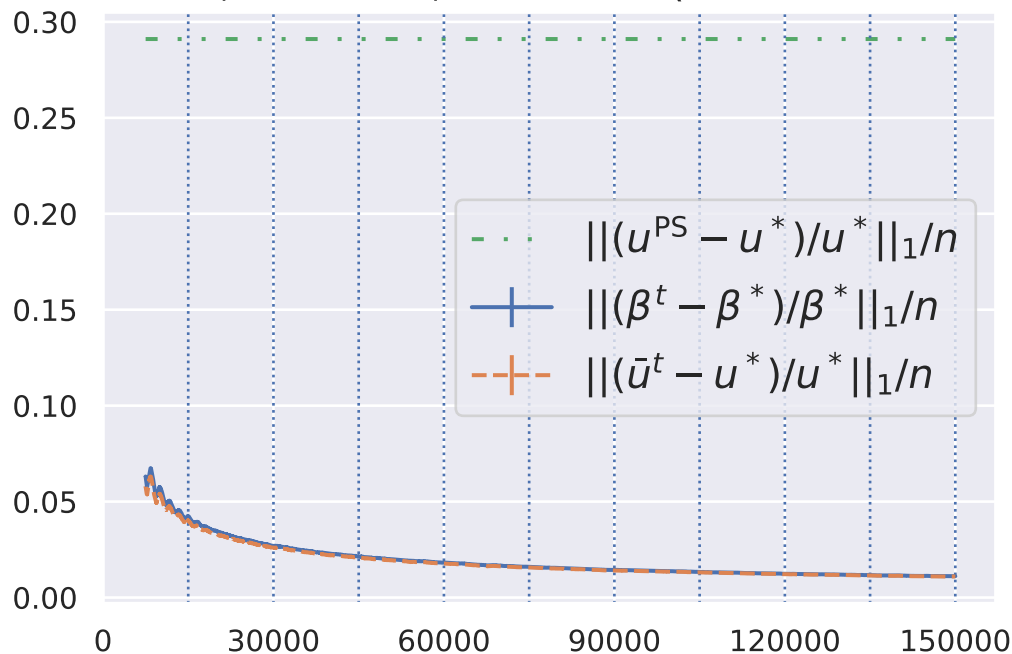

Supplement: supplementary_material [file attachment]
